# Supplementary material for: Evaluation of macro- and microelement levels for verifying the authenticity of organic eggs by using chemometric techniques
Source: Royal Society of Chemistry journal article supplement (doi:10.1039/c4ay02986k), 2015-01-01
Supplement: c4ay02986k1.xlsx [file c4ay02986k1.xlsx]

## Sheet: Plan1
			Fe	Mg	Cu	Zn	Na	K	Ca	P	Cr	As	Mn	Tl	Co	Se	Rb	Ni	Ba	V	Eu
		Q1	84647.8	484943	3795.88	81637.8	5041.18	4898.87	1377.34	5370.98	1801.95	10.8435	1007.53	1.81	5.7615	640.373	10602.2	26.304	3493.7	49.1235	1.1665
		Q2	80779	425237	3987.23	80569.5	4518.22	5022.11	1502.57	5541.47	1899.75	11.0285	907.536	1.464	5.7715	561.538	9752.02	37.6465	3140.66	67.338	0.9895
		Q3	89710.8	444672	3963.18	84301.5	4497.08	5137.71	1557.97	5486.93	2080.81	11.9945	1285.25	1.4255	5.586	708.939	9607.63	25.35	3346.09	72.8465	1.209
		Q4	66855.7	588607	3040.02	53412.8	5201.38	5276.34	895.18	4191.28	2060.45	17.4265	695.439	1.3	3.819	612.263	9766.74	17.491	2390.25	85.7115	0.879
		Q5	77597.3	444925	4015.37	82389.9	4383.83	4359.72	1220.05	5341.44	2209.36	13.368	1073.78	1.559	4.2425	591.793	8097.28	20.2925	4200.72	84.509	1.296
		Q6	72180	515466	3205.83	62008.5	5429.51	5460.64	1031.23	4686.53	2090.27	12.4695	1171.41	1.423	4.285	545.963	11597.4	20.1865	4156.92	86.058	1.4115
		Q7	86122.2	409893	3862.47	74785.7	4859.5	4882.67	1218.54	5372.35	2615.58	19.8845	989.08	3.1815	6.453	625.574	5003.6	25.341	3039.18	87.217	0.7445
		Q8	85574.3	497630	3698.08	66046	5483.88	4971.44	1061.49	4909.6	2431.8	17.758	959.758	3.3645	5.356	628.081	5663.63	17.269	2309.64	95.8755	0.8675
		Q9	83147.3	486758	3522.17	53987.9	5162.08	5062.33	957.12	4633.39	2382.26	15.149	928.481	3.317	5.322	692.701	5459.73	25.872	2357.1	98.116	0.7855
		Q10	101577	438360	3871.9	69550.1	4740.08	4821.85	1237.06	5470.15	2502.47	12.7295	1109.64	3.135	4.7755	572.007	5009.38	22.0235	3162.6	96.257	0.997
		Q11	94685.1	475567	3990.36	73385.4	4926.32	4968.47	1133.24	5157.44	2280.4	14.11	1154.93	3.361	6.0095	627.674	5435.1	17.431	3753.49	100.572	1.165
		Q12	96032.1	565012	3924.24	61906.2	5196.61	5152.12	1242.61	4760.94	2751.62	17.0775	1331.6	4.2835	5.844	599.84	5907.13	18.3745	4087.99	103.189	1.4115
		I1	83488.7	542306	4181.93	72478	5626.42	5669.91	1436.57	5460.63	2877.5	17.524	650.916	1.0555	4.5985	699.05	8279.47	29.1285	2796.4	113.657	0.9565
		I2	64395.9	493563	4066.5	69962.7	4739.93	6622.61	1371.75	5440.84	2842.38	14.2825	1037.58	0.9945	4.472	630.001	8963.91	23.326	2539.75	105.089	0.9155
		I3	82480.7	477084	4143.16	74827.9	5855.2	5577.43	1363.45	5393.42	2737.14	15.433	1088.29	0.999	4.887	644.037	8020.91	20.7755	2765.51	109.966	1.01
		I4	69825.7	482472	4556.85	82529.4	4700.12	5408.82	1384.77	5472.49	2428.39	14.5675	852.354	0.886	4.355	613.412	8377.56	25.0075	2924.32	100.84	0.8725
		I5	84609.8	456330	4649.07	84591.5	5040.07	5625.28	1552.53	5598.34	2649.48	17.1205	1058.48	1.318	6.7995	649.642	7953.47	125.618	2807.08	110.356	0.8775
		I6	81825	592738	3421.74	75851.9	4651.56	5214.92	1535.31	5233.22	2652.89	13.7415	1123.47	0.8335	4.9065	704.884	8054.5	22.902	4474.61	106.832	1.3735
		P1	107247	426000	4457.28	86738.3	3674.92	4750.22	1802.85	6283.46	2311.21	16.782	1538.01	0.879	7.059	861.598	6825.99	21.443	2901.55	120.183	0.862
		P2	85998.6	450915	3627.05	68896.7	5578.04	5315.33	1420.82	5556.79	2707.96	16.6675	1519.56	1.1695	5.5285	680.672	8430.56	18.563	1520.75	121.452	0.5105
		P3	75310.6	550129	3813.96	73364	5012.31	5684.74	1563.1	5470.96	2587.77	16.422	1632.08	1.4155	6.123	732.397	10629.7	17.908	2740.27	118.357	0.952
		P4	60976.8	678309	3265.77	58170.8	8039.54	8753.53	1065.73	4357.78	2669.99	26.736	951.96	1.177	5.01	690.26	14744.8	16.6605	1748.93	140.758	0.567
		P5	82277.1	371687	4072.67	85762	3441.59	4732.55	1496.57	6552.58	2655.54	14.257	1566.7	1.1125	6.4885	963.52	7265.72	20.009	2331.73	110.799	0.8505
		P6	79746.9	478010	3737.25	64408.9	5861.83	6227.56	1182.59	4995.34	2425.7	17.897	1236.51	1.216	5.323	754.245	10853.4	24.3985	2989.38	121.773	0.828
		T1#	94243.7	462548	4095.46	74833.9	4712.18	5874.46	1513.53	5685.39	2375.95	23.4815	1388.92	2.6615	12.695	611.776	18258.8	21.119	2727.75	116.551	0.908
		T2#	98068.7	469066	3807.97	71705.6	4458.17	5881.33	1296.58	5505.05	2075.77	22.726	1433.31	3.837	11.801	618.363	21377.3	20.726	2815.06	111.656	0.9765
		T3#	93856.3	564646	4640.04	76240.1	4993.34	5397.17	1694.34	5593.63	2599.77	23.3105	1683.31	3.517	10.8355	625.957	18281.2	23.7435	3204.54	120.504	1.065
		T4#	96809.1	598850	3823.11	71840	5043.75	6346.56	1350.99	5320.67	2312.76	28.1365	1308.35	4.5665	10.8435	520.827	21750.6	19.999	3598.76	134.819	0.913
		T5#	72061.9	537371	3744.85	69792.5	5169.75	5837.51	1676.21	5222.73	2301.71	25.819	1108.03	3.202	8.369	561.593	22946.6	27.6375	2754.08	123.458	0.6275
		T6#	73853.8	423839	3815.77	72103.6	4842.79	6060.51	1133.28	5306.89	2348.23	27.7645	1492.12	3.3525	13.0575	664.738	19210.9	17.517	2752.6	122.562	0.928
		T7#	93528.6	528805	3713.13	75159.5	5594.4	5032.56	1418.69	5083.39	2369.67	25.603	1777.61	5.4605	8.56	845.306	10757	27.03	2511.67	133.151	1.0725
		T8#	97279.2	482165	3734.79	68928.8	3928.24	3847.92	1461.62	4431.98	1752.94	29.377	832.348	2.9025	7.9785	665.459	7361.3	24.1515	2335.28	130.826	0.783
		T9#	93543.7	585287	3323.64	66853.5	5219.16	3953.07	1396.31	4545.93	1335.1	36.2905	1111.72	4.1205	7.59	793.997	8269.4	15.299	2419.89	118.417	0.674
		T10#	82449.8	439768	3524.87	67714.9	4907.78	4385.47	1407.69	4838.75	1955.98	22.026	1336.88	3.4045	7.1645	772.706	8242.15	14.367	1595.11	128.449	0.7935
		T11#	101488	472576	3819.46	69639.8	4828.91	4362.91	1479.28	4937	1985.25	25.056	1150.99	5.4435	6.887	678.845	9494.44	21.721	2799.55	121.66	0.9225
		T12#	100261	363898	4123.24	89845.9	3223.67	3506.77	1981.79	5816.8	1949.93	18.207	1318.8	3.729	8.151	752.762	7110.33	21.747	2581.22	126.19	0.889
		T13#	97791.4	512572	3988.84	75055	4753.18	4096.49	1644.04	5305.08	2315.65	25.7085	1809.61	3.2025	7.217	760.259	8352.03	19.4235	2523.2	126.927	1.0025
		T14#	72259	540415	3846.66	69895.5	6474.96	5204.63	1278.14	4679.94	2120.29	26.581	1788.58	4.246	6.6785	780.09	11326.3	16.183	1900.99	144.811	0.8735
		T15#	99573.8	566925	3563.08	65871.1	5502.36	4953.73	1178.2	4676.28	2018.33	23.016	1160.1	4.034	6.4255	718.034	9335.37	14.4735	2428.09	144.139	0.8735
		T16#	82295.1	521555	3981.15	70088.7	5173.28	4664.44	1325.1	4926.49	2196.62	25.5405	886.778	2.6365	5.6535	772.289	9410.56	15.5695	1785.96	139.855	0.8125
		C1#	85047.4	501708	3831.86	60166.3	6301.37	5716.02	1261.94	4540.54	1916.48	24.6045	1533.5	3.2345	9.068	645.004	10350.3	18.6695	2895.38	148.149	1.052
		C2#	93959.8	550769	3049.66	59240.4	5700.53	5826.48	1460.83	4501.71	2059.55	24.4365	1214.27	5.2975	8.6765	710.478	11472	16.696	3157.76	150.985	1.0485
		C3#	114515	386235	3740.16	81663.4	3338.67	3975.54	1780.8	5909.59	2364.84	20.834	2400.6	4.8945	8.5625	729.189	7224.4	23.54	4715.89	120.328	1.6405
		C4#	91625.4	443681	3565.37	69053.2	4904.15	5305.69	1351.32	5073.97	2239.64	19.9805	822.919	3.0975	5.872	722.12	9581.48	17.962	3319.2	143.232	1.1955
		C5#	99590	403731	3884.62	71105.6	3850.61	4180.62	1631.9	5501.59	2202.88	20.134	1297.9	4.1195	8.3965	763.817	7373.42	18.6375	4015.15	121.645	1.0355
		C6#	114779	419377	3537.56	70019.9	4495.47	4863.8	1540.15	5137.13	2066.84	20.134	1025.03	4.3055	9.3875	656.344	9751.31	17.3745	3764.42	122.368	0.947
		1A#	75042	441220	3675.44	61900	5172.23	4995.04	1264.17	4582.68	2101.09	27.267	1422.78	0.9955	9.0075	731.484	13990.6	16.2505	2908.25	108.095	0.8135
		1B#	80284	487440	3685.58	69507.8	5082.35	5521.6	1544.34	4758.17	2199.78	26.613	1567.58	1.3115	10.4805	764.466	15612.3	18.745	3924.3	112.219	1.035
		1C#	92180.7	421794	3783.72	72046.4	5208.72	5230.84	1391.01	4976.16	2016.21	22.697	1039.74	1.215	8.56	814.587	14766.6	14.095	3570.71	114.238	0.878
		2A#	78699.4	526050	3801	64768.4	5774.39	5839.09	1343.66	4590.79	2133.44	22.8695	1372.15	0.6535	7.871	748.466	16884.2	18.5655	3012.7	110.283	0.914
		2B#	78562.9	416117	3972.94	72315.1	4992.83	4957.19	1702.81	5123.24	2204.88	20.262	1489.85	1.395	10.6565	936.447	14029.7	19.3765	3754.17	107.57	1.0985
		2C#	76140.6	488511	3516.43	61306.9	5096.41	5312.1	1264.48	4566.3	2226.21	18.479	921.366	0.9445	7.039	847.224	14774	13.6505	4677.16	96.637	0.8405
		3A	88165.7	462736	3743.84	69058.6	5166.2	5373.23	1365.26	4852.38	2166.36	20.6155	1446.66	0.8205	7.8945	865.275	16107.8	15.9735	3233.19	95.623	0.905
		3B#	87099.4	488451	3654.15	62883.5	4938.59	5338.12	1118.84	4452.04	1912.58	18.305	1193.29	0.977	7.583	729.716	15244.6	10.8115	3534.26	122.203	0.918
		3C#	83609.2	470941	3733.57	67788.5	4961.11	5703.75	1483.55	4617.64	1953.79	18.1915	1239.55	1.089	8.6675	773.115	16442.4	18.7665	3711	102.101	0.9925
		4A#	78339.3	457162	3592.46	65268.1	5287.33	5598.97	1151.83	4657.2	2051.13	18.64	1044.33	0.9595	9.074	769.631	14986.5	13.5215	3957.29	102.566	1.0325
		4B#	81823.1	481333	3765.02	66994.7	4914.46	5343.44	1269.37	5037.98	2222.68	18.9565	1427.73	0.794	8.2765	759.495	13936.5	14.116	3937.17	87.6335	1.0725
		4C#	92341.5	430788	3939.95	69869.1	4537.05	5802.03	1298.31	4803.55	1949.49	17.1425	1465.19	0.8095	8.1725	722.745	16329.3	14.0375	4545.03	93.2715	1.0495
		5A#	84032.8	459116	4138.99	69468.3	5067.27	5389.35	1293.1	4940.13	2207.11	21.7585	1319.32	0.7315	8.0645	754.052	16639.5	15.1465	3722.16	98.237	1.1045
		5B#	86627.1	441542	3626.1	66215.4	4852.3	5159.09	1258.33	4662.68	2059.42	26.8167	1387.68	1.0175	9.576	846.297	16202.9	17.0805	3886.6	100.234	1.064
		5C#	80454.3	459952	3461.75	65866.6	5310.77	5603.54	1119.58	4797.35	2113.68	18.2115	1458.04	0.8545	7.0065	733.578	15171.1	13.2045	3978.64	96.3955	1.0695
		s1	11022.8	68256.7	399.353	10009.3	866.601	866.836	224.901	528.66	298.448	3.34319	258.503	1.0253	0.862966	93.6654	2379.5	21.6042	752.028	19.9568	0.241219
		(S1)^2	1.21501e+08	4.65897e+09	159483	1.00187e+08	750997	751404	50580.4	279482	89071.3	11.1769	66824	1.05124	0.744711	8773.21	5.66202e+06	466.74	565546	398.275	0.0581867
		s2	11027.2	49407	225.663	6223.12	704.193	620.01	206.967	369.49	123.961	3.18774	319.73	1.63771	1.24008	61.5962	3393.78	2.95387	828.448	18.5547	0.163639
		(S2)^2	1.21599e+08	2.44105e+09	50923.8	3.87272e+07	495888	384412	42835.2	136523	15366.4	10.1617	102227	2.68208	1.5378	3794.09	1.15177e+07	8.72536	686326	344.275	0.0267776
		s^2	1.21563e+08	3.25818e+09	90919.3	6.13703e+07	589875	519620	45688.7	189192	42520.9	10.5357	89184	2.08124	1.24561	5628.5	9.36036e+06	177.468	641828	364.17	0.0383494
n1	22	s	11025.6	57080.4	301.528	7833.92	768.033	720.847	213.749	434.962	206.206	3.24588	298.637	1.44265	1.11607	75.0234	3059.47	13.3217	801.142	19.0832	0.19583
n2	37	t	-2.22406	0.785576	1.30786	1.44595	0.49438	1.30276	-1.59618	2.63791	5.86193	-8.56866	-2.77389	-2.36834	-10.7281	-3.28222	-6.2198	2.40158	-1.00085	-3.61607	0.207658
		T	-2.2243	0.724379	1.14317	1.28863	0.468848	1.19792	-1.56229	2.41262	4.87072	-8.46382	-2.92832	-2.65239	-11.7383	-2.96086	-6.79379	1.8597	-1.02613	-3.54865	0.188634
		(s1^2/n1+s2^2/n2)^1/2	2968.04	16665.7	92.8738	2366.57	218.033	211.055	58.7947	128.037	66.8132	0.884694	76.1601	0.346803	0.274614	22.3903	754.092	4.63155	210.371	5.23528	0.0580394
		(s1^2/n1+s2^2/n2)	8.80924e+06	2.77746e+08	8625.54	5.60064e+06	47538.6	44544.3	3456.82	16393.5	4464	0.782683	5800.36	0.120272	0.0754127	501.325	568654	21.4513	44256	27.4081	0.00336857
		x1	82378.8	490692	3869.58	72565.1	5069.22	5399.88	1317.1	5280.76	2443.86	15.6362	1119.6	1.77833	5.36567	667.936	8345.91	26.6384	2999.11	100.286	0.979083
		x2	88980.6	478620	3763.41	69515.5	4966.99	5147.06	1408.96	4971.86	2118.43	23.1241	1342.62	2.69819	8.58918	734.231	13469.1	18.0251	3214.98	118.865	0.968135
		x1-x2	-6601.79	12072.3	106.17	3049.62	102.225	252.826	-91.8543	308.905	325.428	-7.48789	-223.021	-0.919856	-3.22351	-66.2946	-5123.14	8.61331	-215.869	-18.5782	0.0109482
		(1/n1 +1/n2)^1/2	0.269224	0.269224	0.269224	0.269224	0.269224	0.269224	0.269224	0.269224	0.269224	0.269224	0.269224	0.269224	0.269224	0.269224	0.269224	0.269224	0.269224	0.269224	0.269224
		s(1/n1 +1/n2)^1/2	2968.35	15367.4	81.1786	2109.08	206.773	194.069	57.5464	117.102	55.5156	0.873869	80.4002	0.388396	0.300472	20.1981	823.683	3.58652	215.687	5.13766	0.0527221
			Fe	Mg	Cu	Zn	Na	K	Ca	P	Cr	As	Mn	Tl	Co	Se	Rb	Ni	Ba	V	Eu
		F	0.999194	1.90859	3.1318	2.587	1.51445	1.95468	1.18081	2.04714	5.79649	1.09991	0.653681	0.391948	0.48427	2.31233	0.491592	53.4923	0.82402	1.15685	2.17296
		1.83	1.00081	0.523946	0.319306	0.386549	0.660306	0.511592	0.846874	0.488485	0.172518	0.909168	1.5298	2.55136	2.06496	0.432464	2.03421	0.0186943	1.21356	0.864416	0.460201
				x	x	x		x		x	x	x		x	x	x	x	x			x
		1.83427	-2.22406	0.785576	1.30786	1.44595	0.49438	1.30276	-1.59618	2.63791	5.86193	-1.40091	-2.77389	-2.36834	-10.7281	-3.28222	-6.2198	2.40158	-1.00085	-3.61607	0.207658
		2.02439	-2.2243	0.724379	1.14317	1.28863	0.468848	1.19792	-1.56229	2.41262	4.87072	-1.81812	-2.92832	-2.65239	-11.7383	-2.96086	-6.79379	1.8597	-1.02613	-3.54865	0.188634
			x							x	x			x	x	x	x	x		x
Concentrations in ng/g, excepted by Na, K, Ca and P
			Fe	Mg	Cu	Zn	Na	K	Ca	P	Cr	As	Mn	Tl	Co	Se	Rb	Ni	Ba	V	Eu
			13.3806	13.9103	10.3203	13.7936	17.0954	16.0529	17.0754	10.0111	12.2122	0.213811	23.0889	57.655	16.0831	14.0231	28.511	81.1017	25.075	19.8998	24.6373	#DIV/0!
			12.3928	10.3228	5.99623	8.95212	14.1774	12.0459	14.6894	7.43162	5.85156	0.137854	23.8139	60.6965	14.4377	8.38922	25.1968	16.3876	25.7684	15.6099	16.9025	#DIV/0!
			Fe	Mg	Cu	Zn	Na	K	Ca	P	Cr	As	Mn	Tl	Co	Se	Rb	Ni	Ba	V	Eu
		Average	82378.8	490692	3869.58	72565.1	5069.22	5399.88	1317.1	5280.76	2443.86	15.6362	1119.6	1.77833	5.36567	667.936	8345.91	26.6384	2999.11	100.286	0.979083
		Median	82814	480241	3898.07	73374.7	5026.19	5183.52	1367.6	5382.89	2467.14	15.291	1081.04	1.36675	5.3395	642.205	8188.38	21.7332	2912.94	102.014	0.93375
		SD	11022.8	68256.7	399.353	10009.3	866.601	866.836	224.901	528.66	298.448	3.34319	258.503	1.0253	0.862966	93.6654	2379.5	21.6042	752.028	19.9568	0.241219
		Average	88980.6	478620	3763.41	69515.5	4966.99	5147.06	1408.96	4971.86	2118.43	23.1241	1342.62	2.69819	8.58918	734.231	13469.1	18.0251	3214.98	118.865	0.968135
		Median	88165.7	470941	3744.85	69507.8	4993.34	5312.1	1365.26	4926.49	2120.29	22.8695	1336.88	3.0975	8.369	748.466	14029.7	17.517	3204.54	120.504	0.947
		SD	10684.2	55957.8	262.655	5755.19	652.597	697.541	198.452	400.831	214.417	4.04642	310.382	1.59309	1.72918	85.1307	4436.93	3.91401	780.354	16.713	0.167446
